# Supplementary material
Source: Springer Nature journal article supplement (https://www.springermedizin.de/resource/supplementary/12936_2012_2185_MOESM1_ESM.pdf/9542784)

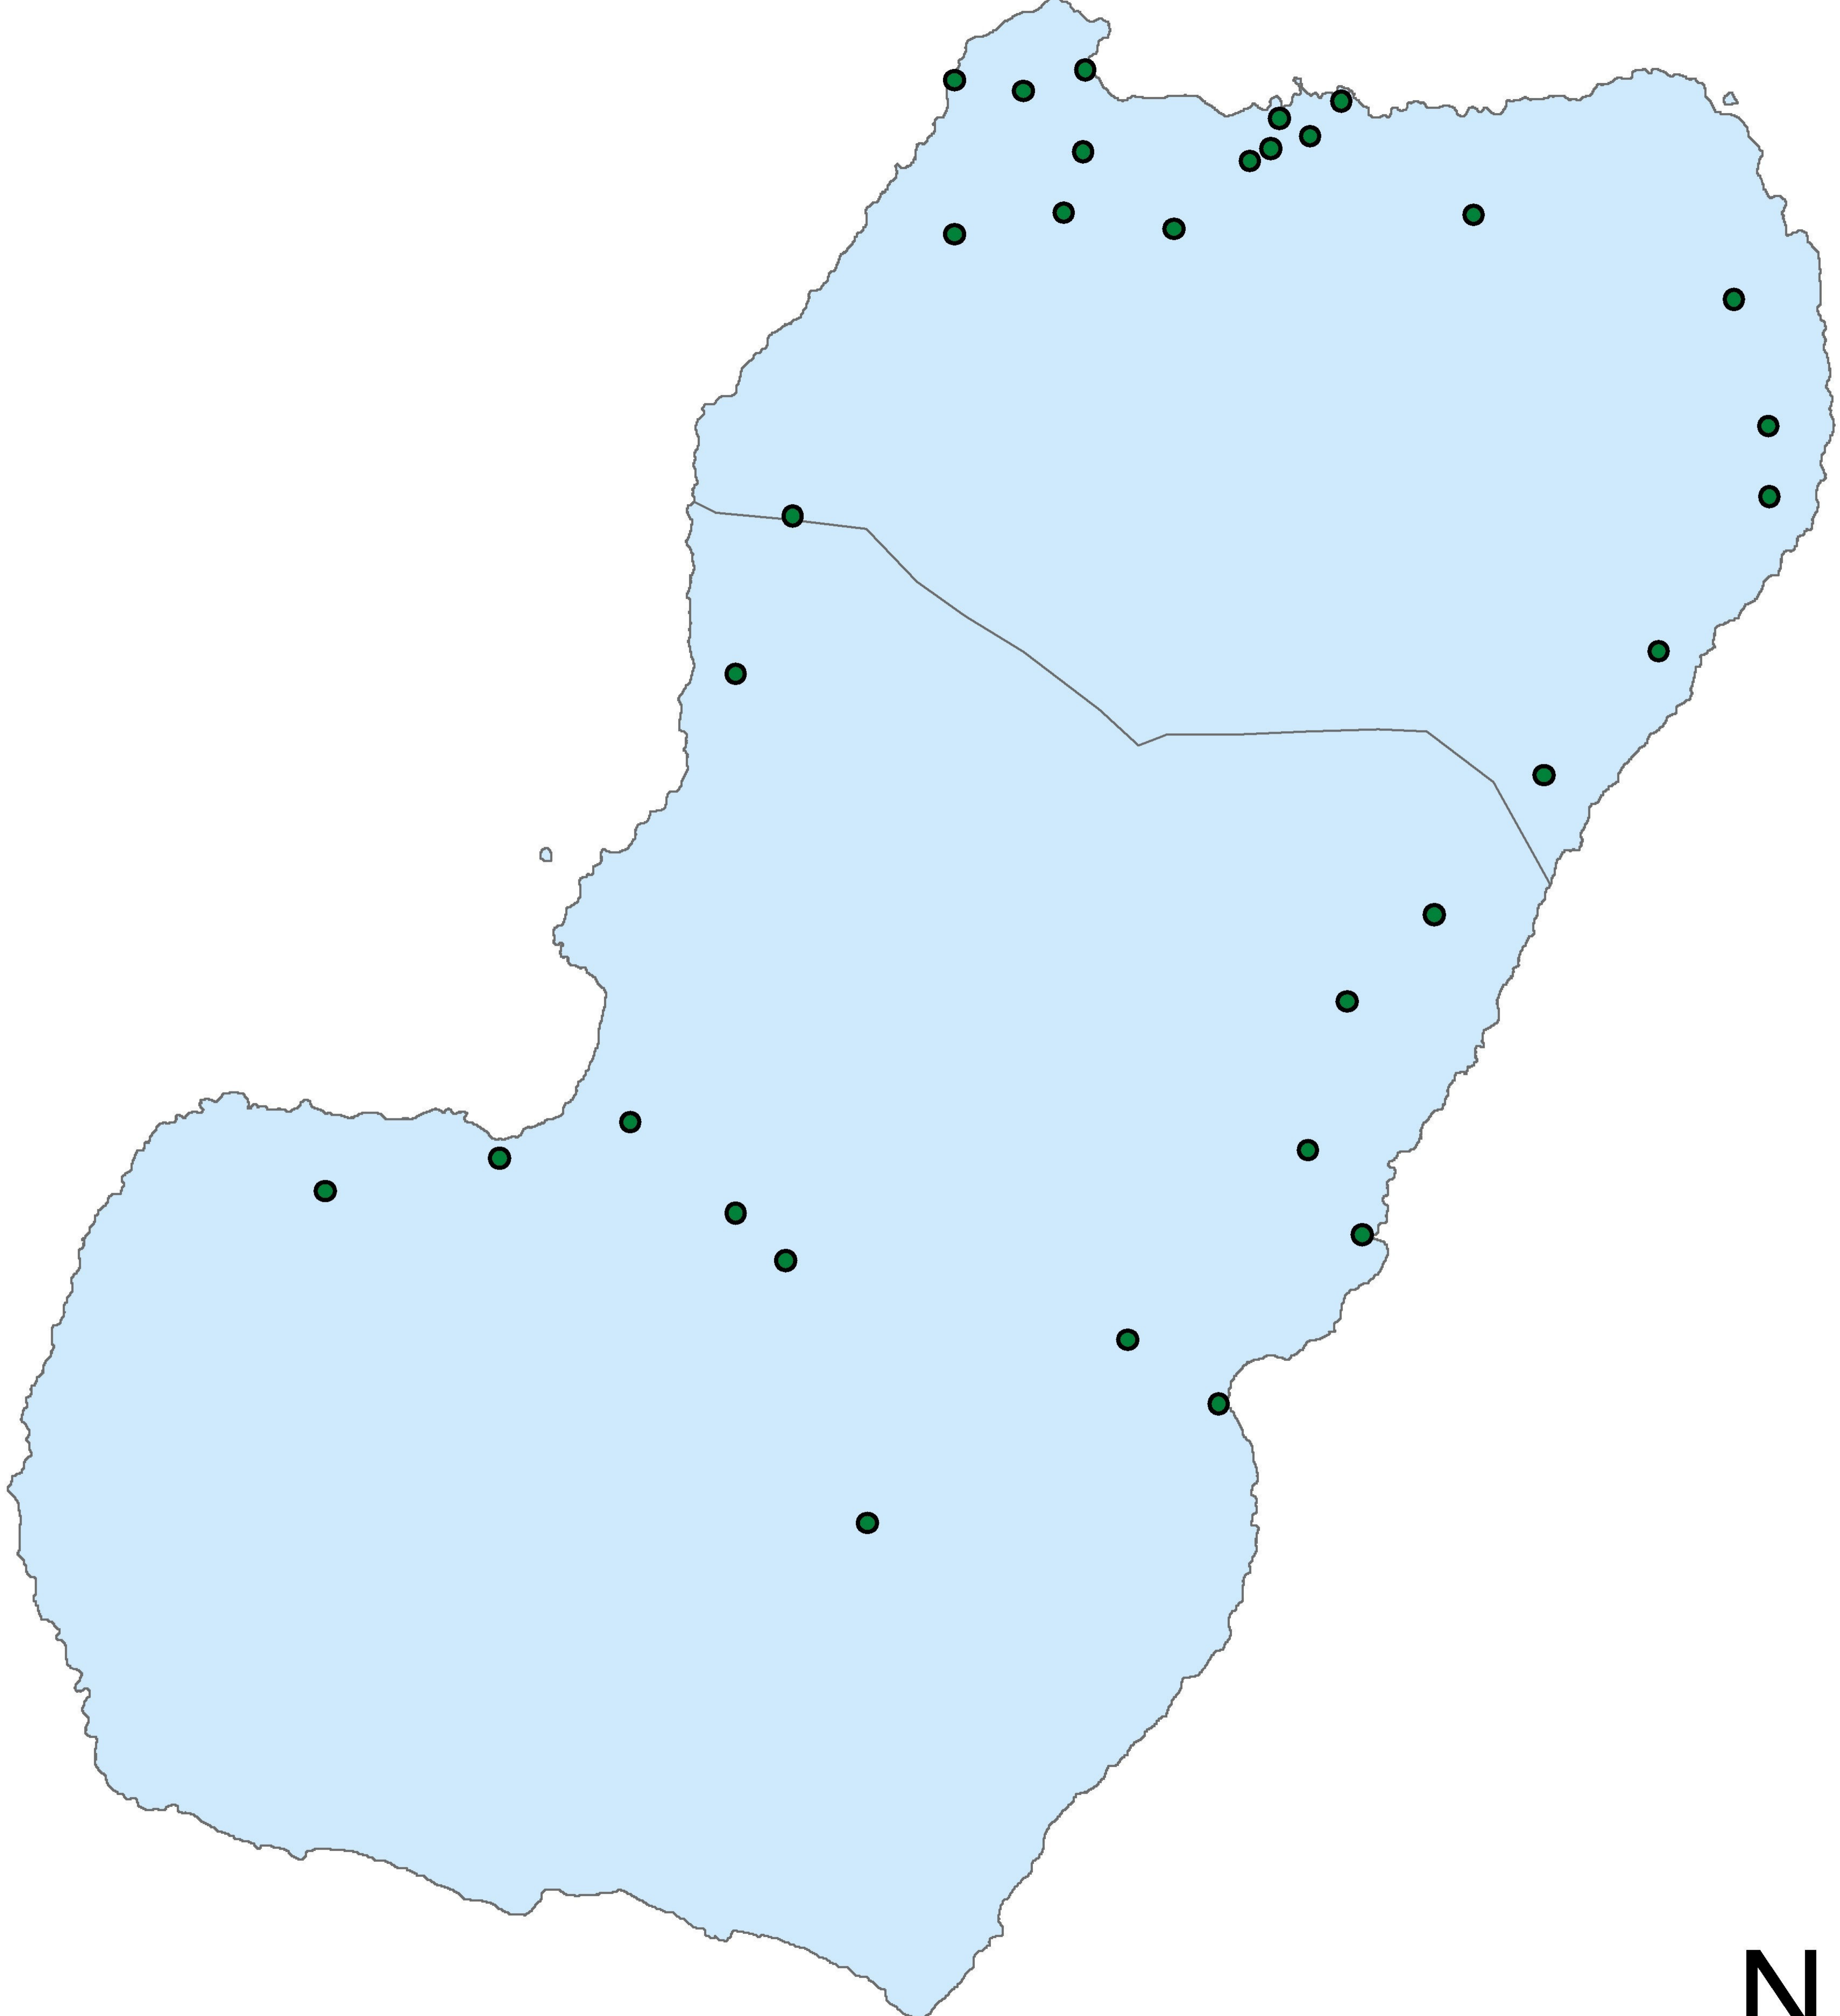

0 5 10 20 Kilometers

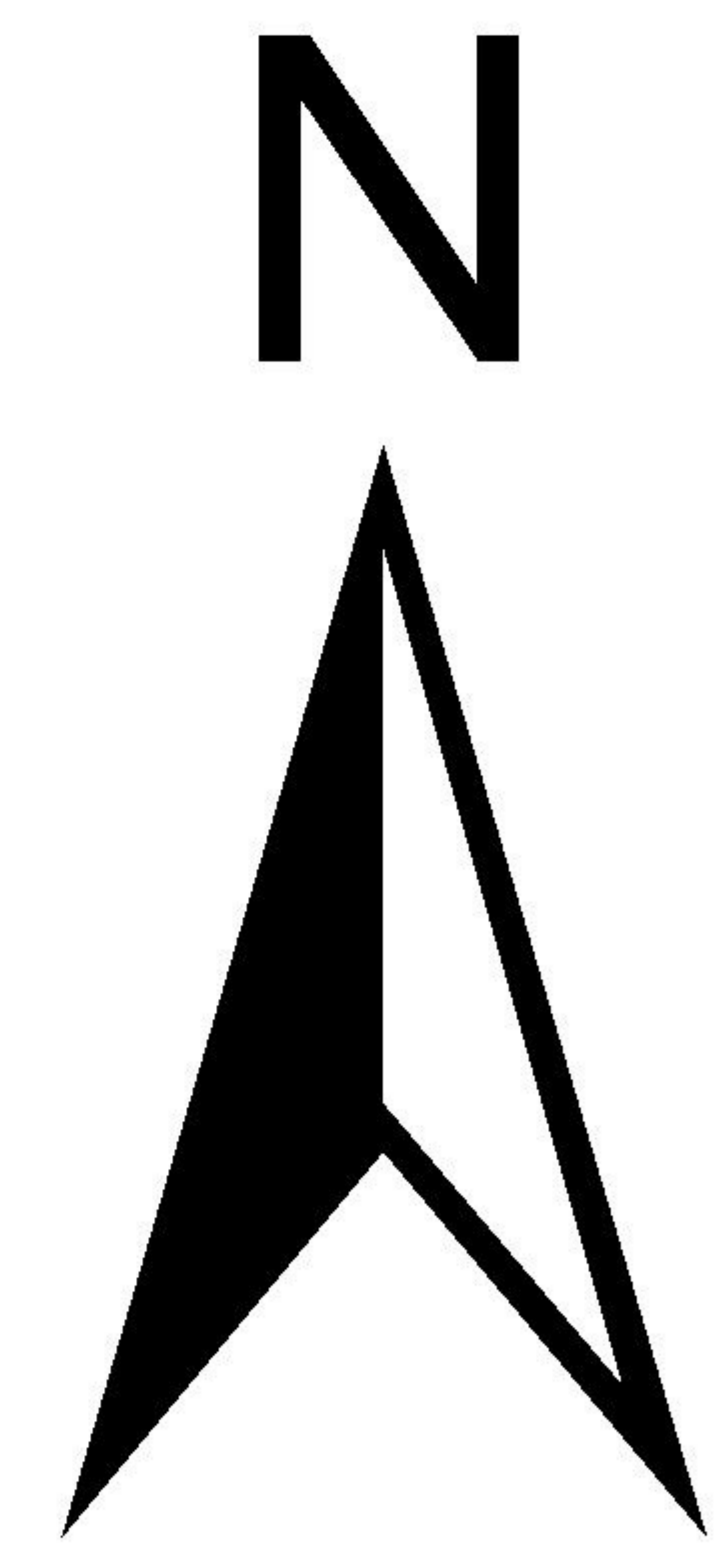

Supplement: MOESM1 [file 9542784]
